# Supplementary material
Source: PubMed Central journal article supplement (PMC1183578)

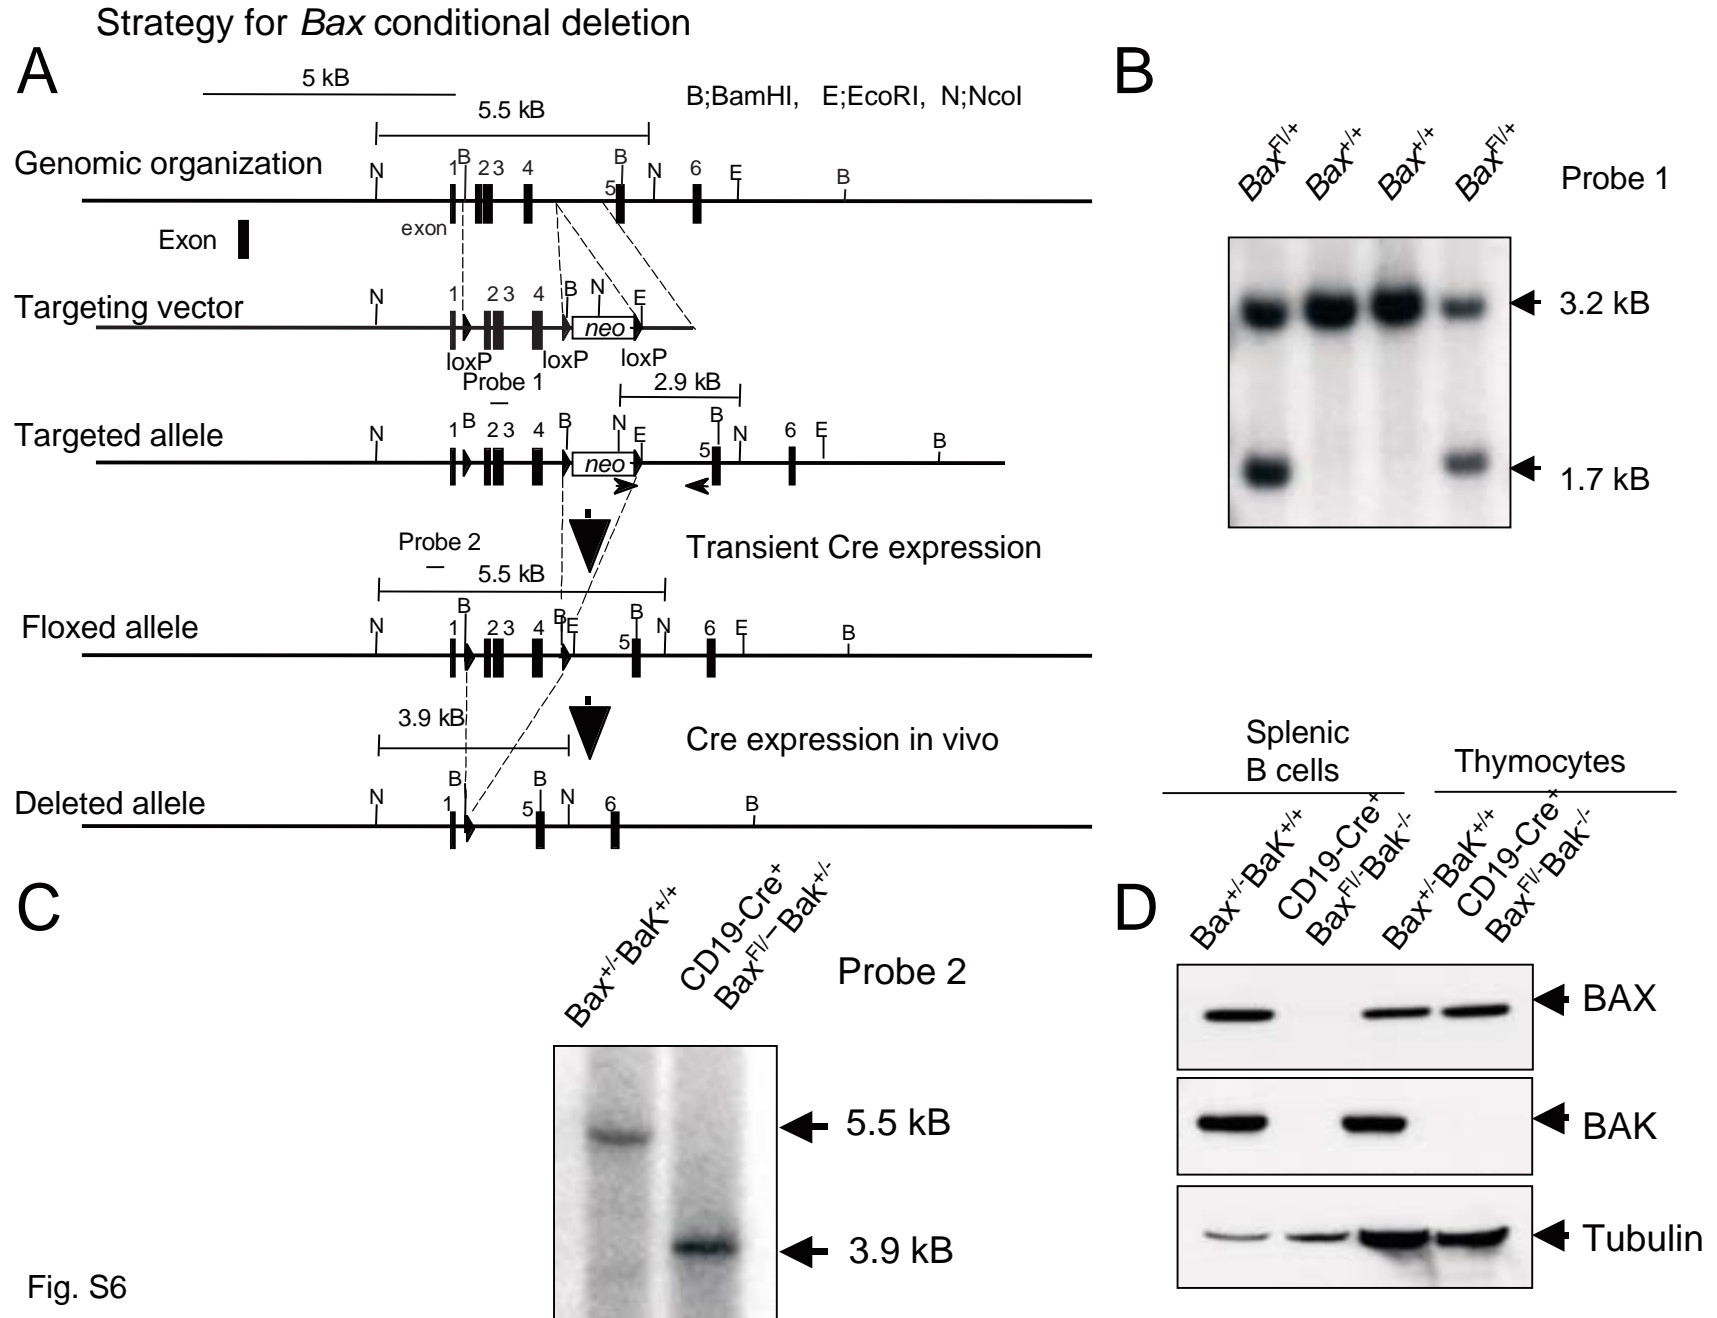

Fig. S6

Supplement: pnas_0504783102_1.pdf [file pnas_0504783102_1.pdf]

### Strategy for *Bim* deletion

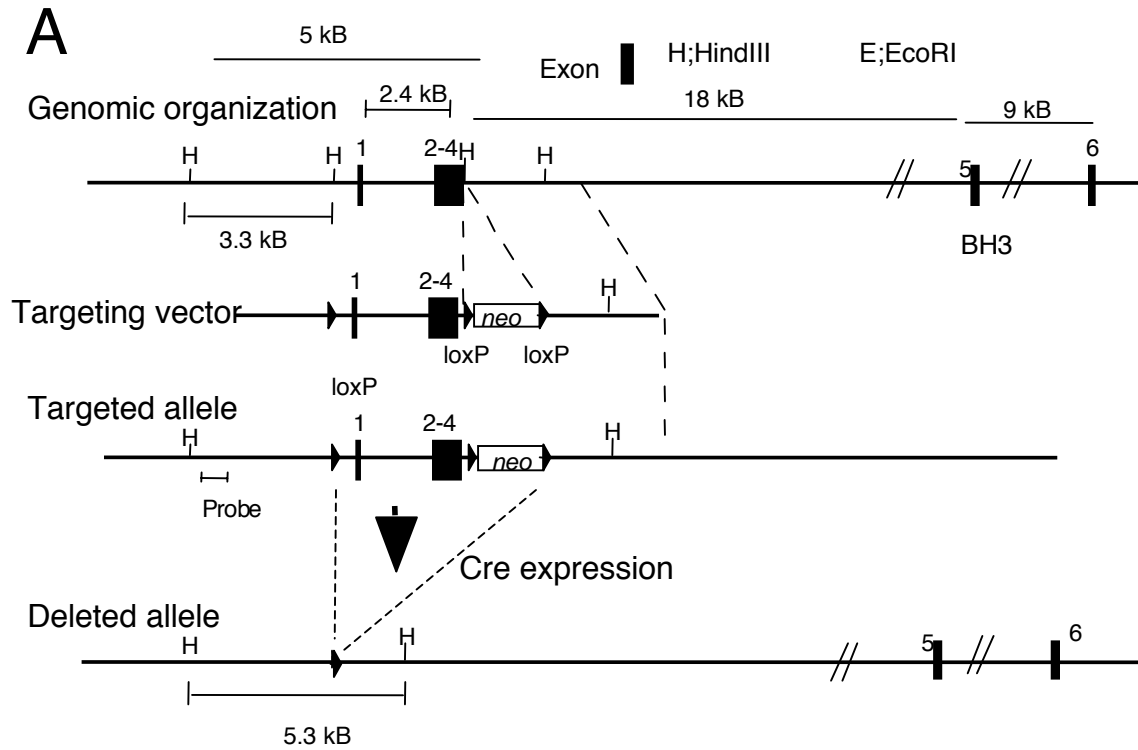

### B Southern Blotting

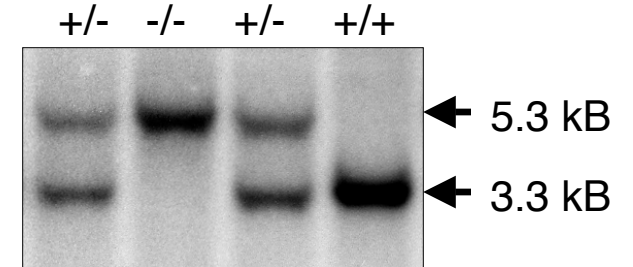

### C Splenocytes

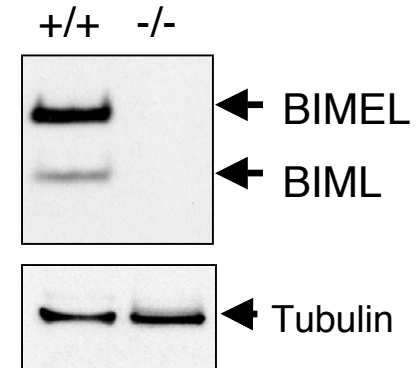

Supplement: pnas_0504783102_2.pdf [file pnas_0504783102_2.pdf]

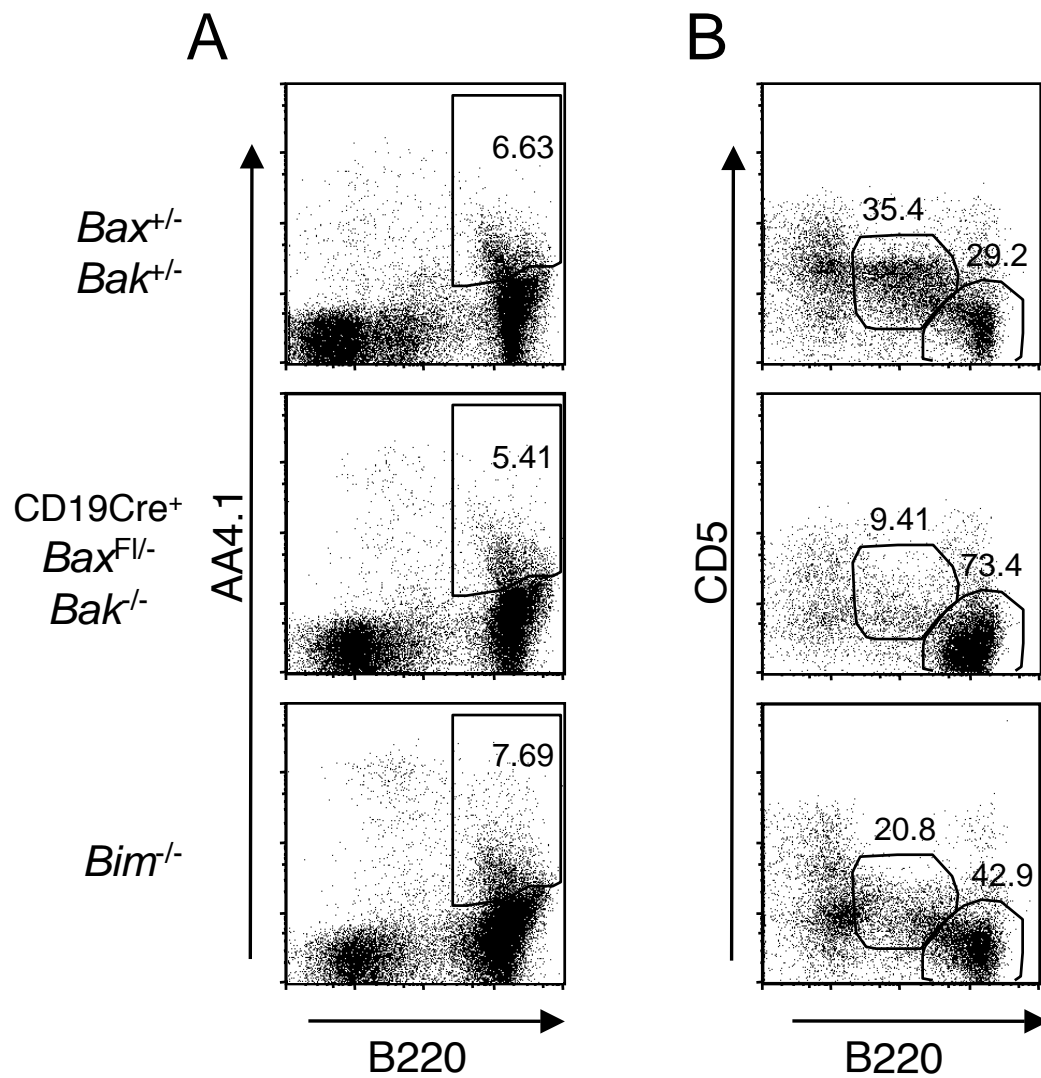

Supplement: pnas_0504783102_3.pdf [file pnas_0504783102_3.pdf]
